# Supplementary material for: Quantification of liver steatosis of metabolic dysfunction-associated steatotic liver disease based on body composition analysis
Source: Research Square preprint supplement (doi:10.21203/rs.3.rs-6891676/v1), 2025-07-14
Supplement: Supplementary file 1 [file ce2e29e5f536915f9304b71c.docx]

**Supplementary file**

Supplementary Table S1. Variables of training cohort tested in the stepwise selection method

| Variables | Total (n=365) |
| --- | --- |
| BFM; body fat mass, kg | 25.1 (19.4 - 31.8) |
| SLM; soft lean mass, kg | 42.7 (36.4 - 51.8) |
| FFM; fat free mass, kg | 45.2 (38.4 - 54.7) |
| SMM; skeletal muscle mass, kg | 24.6 (20.5 - 30.6) |
| TBW; total body water, L | 33.3 (28.4 - 40.3) |
| ICW; intracellular water, L | 20.4 (17.3 - 25.0) |
| ECW; extracellular water, L | 12.8 (11.0 - 15.4) |
| Protein, kg | 8.8 (7.4 - 10.8) |
| Minerals, kg | 3.04 (2.59 - 3.71) |
| PBF; percent body fat, % | 36.7 (30.6 - 40.8) |
| LBM of trunk; lean body mass of trunk, kg | 20.8 (17.6 - 25.0) |
| LBM% of trunk, % | 99.8 (94.6 - 104.4) |
| TBW of trunk; total body water of trunk, L | 16.2 (13.7 - 19.5) |
| ICW of trunk; intracellular water of trunk, L | 9.9 (8.3 - 12.1) |
| ECW of trunk; extracellular water of trunk, L | 6.3 (5.4 - 7.4) |
| ECW/TBW; extracellular water/total body water | 0.386 (0.380 - 0.392) |
| BFM of trunk; body fat mass of trunk, kg | 13.0 (10.1 - 16.4) |
| BFM% of trunk, % | 288.6 (231.3 - 370.0) |
| Target Weight, kg | 58.6 (51.2 - 66.9) |
| Weight Control; target weight - body weight, kg | -13.3 (-19.6 - -6.8) |
| BFM Control; body fat mass control, kg | -13.8 (-19.7 - -8.6) |
| FFM Control; fat free mass control, kg | 0 (0 - 1.9) |
| BMR; basal metabolic rate, kcal | 1347 (1199 - 1552) |
| Obesity Degree, % | 129 (114 - 146) |
| BCM; body cell mass, kg | 29.2 (24.7 - 35.8) |
| BMC; bone mineral content, kg | 2.51 (2.16 - 3.04) |
| TBW/FFM; total body water/fat free mass | 73.6 (73.4 - 73.8) |
| Whole Body Phase Angle (50kHz), ° | 5.1 (4.6 - 5.8) |
| SMI; skeletal muscle index, kg/m2 | 7.2 (6.4 - 8.2) |

Continuous values are shown as mean value (lower and upper quartile).

Supplementary Table S2. Patients' characteristics of training cohort

| Variables | Total (n=365) |
| --- | --- |
| Age, years | 60 (46 - 69) |
| Male / Female (%) | 153 (41.9) / 212 (58.1) |
| Body weight, kg | 71.7 (60.1 - 83.2) |
| Height, cm | 160.2 (153.5 - 168.6) |
| BMI, kg/m2 | 27.8 (24.4 - 31.2) |
| Platelet counts, ×103/μL | 217 (166 - 266) |
| Albumin, g/dL | 4.2 (3.9 - 4.5) |
| AST, U/L | 36 (25 - 52) |
| ALT, U/L | 40 (26 - 63) |
| GGT, U/L | 42 (27 - 77) |
| Total cholesterol, mg/dL | 187 (162 - 213) |
| LDL cholesterol, mg/dL | 117 (93.8 - 140) |
| HDL cholesterol, mg/dL | 50 (43 - 60) |
| Triglycerides, mg/dL | 136 (102 - 187) |
| Fasting plasma glucose, mg/dL | 108 (96 - 137) |
| HbA1c, % | 6.2 (5.7 - 7.4) |
| CAP, dB/m | 299 (259 - 329) |
| LSM, kPa | 6.1 (4.6 - 9.8) |
| FAST Score | 0.32 (0.14 - 0.58) |

Continuous values are shown as mean value (lower and upper quartile). Abbreviations: BMI, body mass index; ALT, alanine aminotransferase; AST, aspartate aminotransferase; GGT, γ-glutamyl transpeptidase; LDL-C, low-density lipoprotein cholesterol; HDL-C, high-density lipoprotein cholesterol; HbA1c, hemoglobin A1c; SMI, skeletal muscle index; PBF, percent body fat; CAP controlled attenuation parameter; LSM, liver stiffness measurement; FAST Score, FibroScan-Based Score.

Supplementary Table S3. Patients’ characteristics of validation cohort

| Variables | Total (n=408) |
| --- | --- |
| Age, years | 62 (51 - 71) |
| Sex, male/female (%) | 154 (37.7) / 254 (62.3) |
| Height, cm | 159.1 (153.4 - 167.8) |
| Body weight, kg | 68.8 (57.0 - 81.4) |
| BMI; body mass index, kg/m2 | 26.4 (23.5 - 30.1) |
| CAP, dB/m | 288 (248 - 321) |
| LSM, kPa | 6.6 (4.7 - 9.2) |
| FAST Score | 0.36 (0.32 - 0.41) |
| BFM; body fat mass, kg | 24.0 (18.5 - 31.9) |
| SLM; soft lean mass, kg | 40.2 (34.7 - 50.3) |
| FFM; fat free mass, kg | 42.7 (36.9 - 53.3) |
| SMM; skeletal muscle mass, kg | 23.0 (19.6 - 29.7) |
| TBW; total body water, L | 31.3 (27.2 - 39.1) |
| ICW; intracellular water, L | 19.1 (16.6 - 24.3) |
| ECW; extracellular water, L | 12.2 (10.6 - 14.9) |
| Protein, kg | 8.3 (7.2 - 10.5) |
| Minerals, kg | 2.92 (2.56 - 3.62) |
| PBF; percent body fat, % | 35.7 (30.7 - 41.1) |
| LBM of trunk; lean body mass of trunk, kg | 19.6 (16.7 - 24.3) |
| LBM% of trunk, % | 97.8 (93.0 - 103.2) |
| TBW of trunk; total body water of trunk, L | 15.3 (13.0 - 18.9) |
| ICW of trunk; intracellular water of trunk, L | 9.4 (7.9 - 11.7) |
| ECW of trunk; extracellular water of trunk, L | 5.9 (5.0 - 7.2) |
| ECW/TBW; extracellular water/total body water | 0.386 (0.380 - 0.392) |
| BFM of trunk; body fat mass of trunk, kg | 12.2 (9.4 - 16.1) |
| BFM% of trunk, % | 276.3 (205.8 - 366.4) |
| Target Weight, kg | 55.7 (50.4 - 65.2) |
| Weight Control; target weight - body weight, kg | -11.5 (-19.1 - -5.1) |
| BFM Control; body fat mass control, kg | -12.7 (-19.9 - -7.6) |
| FFM Control; fat free mass control, kg | 0.1 (0 - 3.2) |
| BMR; basal metabolic rate, kcal | 1292 (1167 - 1521) |
| Obesity Degree, % | 124 (110 - 142) |
| BCM; body cell mass, kg | 27.5 (23.8 - 34.8) |
| BMC; bone mineral content, kg | 2.41 (2.12 - 2.94) |
| TBW/FFM; total body water/fat free mass | 73.6 (73.4 -73.7) |
| 50kHz-Whole Body Phase Angle, ° | 4.9 (4.5 - 5.5) |
| SMI; skeletal muscle index, kg/m2 | 6.9 (6.1 - 8.0) |

Abbreviations: ALT, alanine aminotransferase; AST, aspartate aminotransferase; GGT, γ-glutamyl transpeptidase; LDL-C, low-density lipoprotein cholesterol; HDL-C, high-density lipoprotein cholesterol; HbA1c, hemoglobin A1c; LSM, liver stiffness measurement; CAP controlled attenuation parameter; FAST Score, FibroScan-Based Score.

Supplementary Table S4. Patients’ characteristics of liver biopsy cohort

| Variables | Total (n=158) |
| --- | --- |
| Age, years | 63 (53 - 74) |
| Sex, male/female (%) | 53 (33.5) / 105 (66.5) |
| Height, cm | 157.6 (151.9 - 166.3) |
| Body weight, kg | 69.8 (58.8 - 80.8) |
| BMI; body mass index, kg/m2 | 27.8 (24.3 - 31.2) |
| Platelet counts, ×103/μL | 199 (147 - 248) |
| Albumin, g/dL | 4.2 (4 - 4.5) |
| AST, U/L | 42 (29 - 56) |
| ALT, U/L | 42 (27 - 67) |
| GGT, U/L | 43 (28 - 85) |
| Total cholesterol, mg/dL | 180 (153 - 203) |
| LDL cholesterol, mg/dL | 113 (89 - 135) |
| HDL cholesterol, mg/dL | 53 (43 - 60) |
| Triglycerides, mg/dL | 127 (96 - 173) |
| Fasting plasma glucose, mg/dL | 109 (98 - 130) |
| HbA1c, % | 6.1 (5.6 - 6.9) |
| CAP, dB/m | 291 (250 - 327) |
| LSM, kPa | 8.4 (5.4 - 12.3) |
| FAST Score | 0.46 (0.24 - 0.68) |
| Pathological steatosis score, 0/1/2/3 | 11/105/24/18 |
| Pathological inflammation score, 0/1/2/3 | 5/93/45/15 |
| Pathological ballooning score, 0/1/2 | 46/79/33 |
| Pathological at risk MASH, yes/no | 75/72 |
| Pathological fibrosis stage, 0/1/2/3/4 | 19/47/44/36/12 |
| BFM; body fat mass, kg | 24.6 (18.8 - 30.9) |
| SLM; soft lean mass, kg | 40.7 (35.0 – 50.0) |
| FFM; fat free mass, kg | 42.8 (37.1 - 52.8) |
| SMM; skeletal muscle mass, kg | 23.5 (19.8 - 29.6) |
| TBW; total body water, L | 31.8 (27.3 - 38.9) |
| ICW; intracellular water, L | 19.5 (16.7 - 24.2) |
| ECW; extracellular water, L | 12.2 (10.7 - 14.6) |
| Protein, kg | 8.5 (7.2 - 10.5) |
| Minerals, kg | 2.9 (2.6 - 3.5) |
| PBF; percent body fat, % | 37.4 (30.8 - 41.5) |
| LBM of trunk; lean body mass of trunk, kg | 19.7 (16.8 - 24.2) |
| LBM% of trunk, % | 99.0 (105.1 - 105.1) |
| TBW of trunk; total body water of trunk, L | 18.8 (13.1 - 15.4) |
| ICW of trunk; intracellular water of trunk, L | 9.5 (8 - 11.7) |
| ECW of trunk; extracellular water of trunk, L | 5.9 (5.1 - 7.2) |
| ECW/TBW; extracellular water/total body water | 0.387 (0.381 - 0.393) |
| BFM of trunk; body fat mass of trunk, kg | 12.7 (9.6 - 15.8) |
| BFM% of trunk, % | 282.3 (223.5 - 361.6) |
| Target Weight, kg | 55.6 (50.2 - 63.9) |
| Weight Control; target weight - body weight, kg | -13.6 (-18.7 - -6.7) |
| BFM Control; body fat mass control, kg | -13.9 (-18.8 - -8.4) |
| FFM Control; fat free mass control, kg | 0 (0 - 1.825) |
| BMR; basal metabolic rate, kcal | 1295 (1172 - 1511) |
| Obesity Degree, % | 129 (113 - 146) |
| BCM; body cell mass, kg | 28.0 (23.9 - 34.7) |
| BMC; bone mineral content, kg | 2.41 (2.11 - 2.88) |
| TBW/FFM; total body water/fat free mass | 73.7 (73.5 - 73.9) |
| 50kHz-Whole Body Phase Angle, ° | 5 (4.6 - 5.7) |
| SMI; skeletal muscle index, kg/m2 | 7.1 (6.3 - 8) |

Continuous values are shown as mean value (lower and upper quartile). Abbreviations: ALT, alanine aminotransferase; AST, aspartate aminotransferase; GGT, γ-glutamyl transpeptidase; LDL-C, low-density lipoprotein cholesterol; HDL-C, high-density lipoprotein cholesterol; HbA1c, hemoglobin A1c; LSM, liver stiffness measurement; CAP controlled attenuation parameter; FAST Score, FibroScan-Based Score.
